# Supplementary material for: Development of prostate specific membrane antigen targeted ultrasound microbubbles using bioorthogonal chemistry
Source: PLOS journal article supplement (doi:10.1371/journal.pone.0176958), 2017-05-04

## Structure of biotin-tetrazine (biotin-Tz)

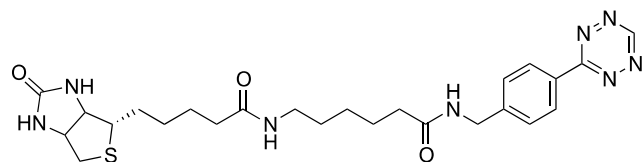

Supplement: S2 (10.1371/journal.pone.0176958.s002) [file journal.pone.0176958.s002]
