# Supplementary material for: Development of prostate specific membrane antigen targeted ultrasound microbubbles using bioorthogonal chemistry
Source: PLOS journal article supplement (doi:10.1371/journal.pone.0176958), 2017-05-04
Supplement: S5 (10.1371/journal.pone.0176958.s005) [file journal.pone.0176958.s005]

**US images showing PSMA-targeting of MB<sub>Tz</sub> using two different PSMA antibodies:**

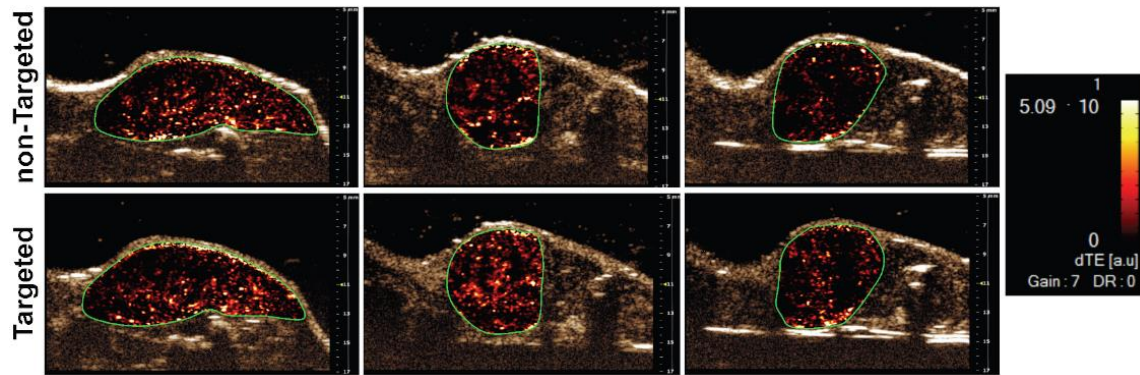

**US images showing localization of MB<sub>Tz</sub>-TCO-J591 to LNCaP tumors.**

LNCaP xenograft tumors (green outline) were produced in mice as described in methods. Transverse color-coded parametric images overlaid on a nonlinear contrast mode ultrasound images were acquired 4 min after intravenous administration of either control non-targeted MB<sub>Tz</sub> (top) or direct PSMA-targeted MB<sub>Tz</sub>-TCO-J591 (bottom). Signals are indicated by dTE = differential targeted enhancement (color scale, right).

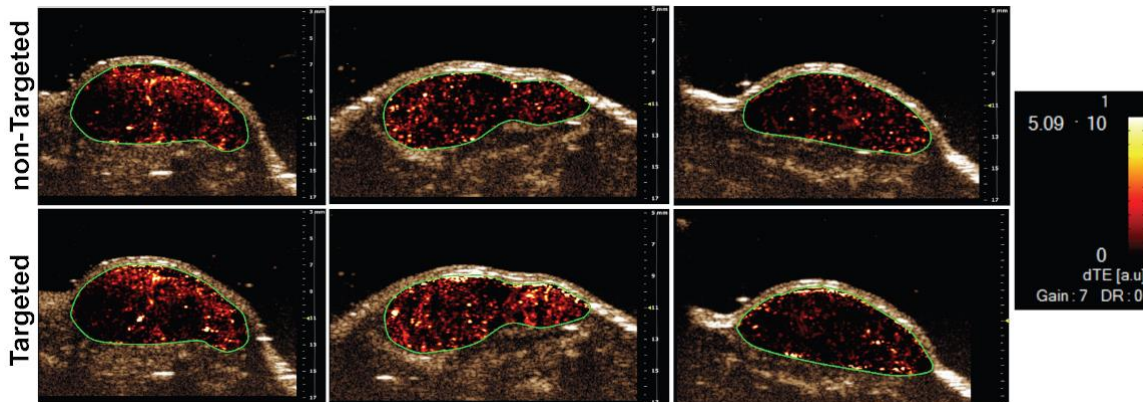

**US images showing localization of MB<sub>Tz</sub>-TCO-ARP to LNCaP tumors.**

LNCaP xenograft tumors (green outline) were produced in mice as described in methods. Transverse color-coded parametric images overlaid on a nonlinear contrast mode ultrasound images were acquired 4 min after intravenous administration of either control non-targeted MB<sub>Tz</sub> (top) or direct PSMA-targeted MB<sub>Tz</sub>-TCO-ARP (bottom). Signals are indicated by dTE = differential targeted enhancement (color scale, right).
